# Supplementary material for: Synthesis and reactivity of Li and TaMe3 complexes supported by N,N′-bis(2,6-diisopropylphenyl)-o-phenylenediamido ligands
Source: Royal Society of Chemistry journal article supplement (doi:10.1039/c6dt01908k), 2016-01-01
Supplement: c6dt01908k1.pdf [file c6dt01908k1.pdf]

## Supplementary Information

### Synthesis and reactivity of Li and TaMe<sub>3</sub> complexes supported by *N,N'*-bis(2,6-diisopropylphenyl)-*o*-phenylenediamido ligands

Trevor Janes, Maotong Xu and Datong Song\*

*Davenport Chemical Research Laboratories, Department of Chemistry, University of Toronto*

*80 St. George Street, Toronto, Ontario, Canada M5S 3H6. Email: [dsong@chem.utoronto.ca](mailto:dsong@chem.utoronto.ca)*

Fax: + 1 416 978 7013; Tel: + 1 416 978 7014

### Contents

|                                      |            |
|--------------------------------------|------------|
| <b>1. NMR Spectra.....</b>           | <b>S2</b>  |
| <b>2. X-ray Crystallography.....</b> | <b>S14</b> |
| <b>3. EPR Spectroscopy .....</b>     | <b>S19</b> |
| <b>4. References .....</b>           | <b>S19</b> |

## 1. NMR Spectra

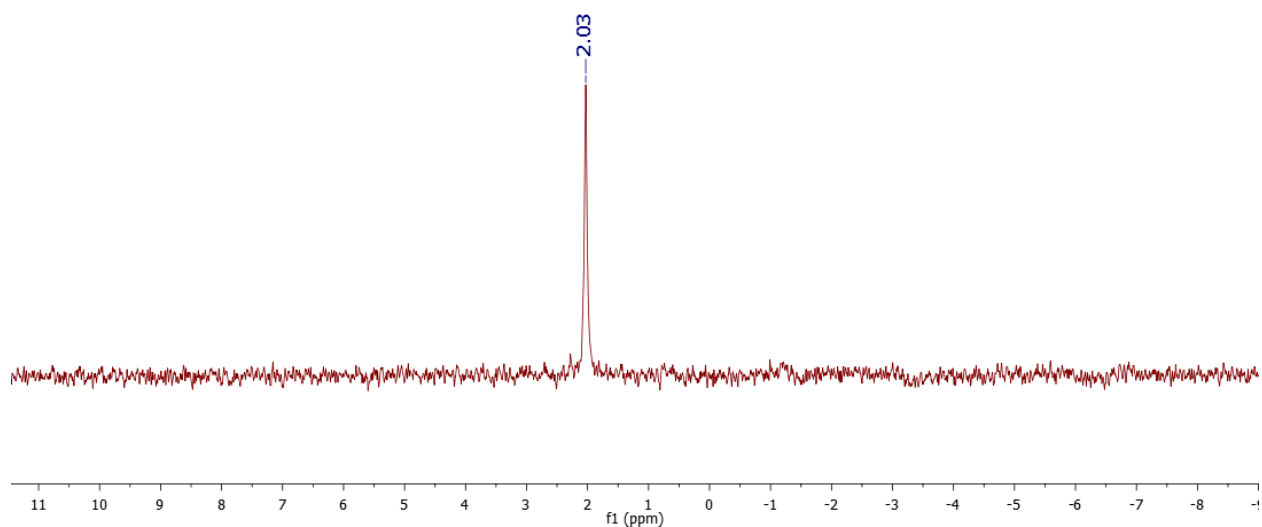

**Figure S1.**  $^7\text{Li}$  NMR Spectrum (233 MHz, 25 °C) of **2** in  $\text{C}_6\text{D}_6$

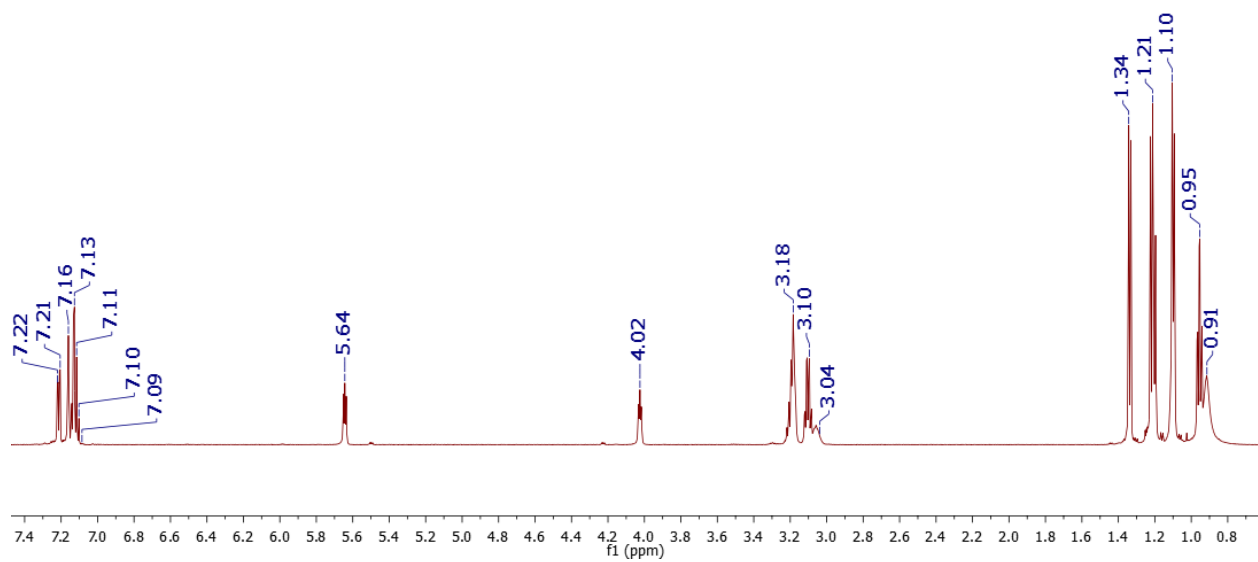

**Figure S2.**  $^1\text{H}$  NMR Spectrum (600 MHz, 25 °C) of **2** in  $\text{C}_6\text{D}_6$

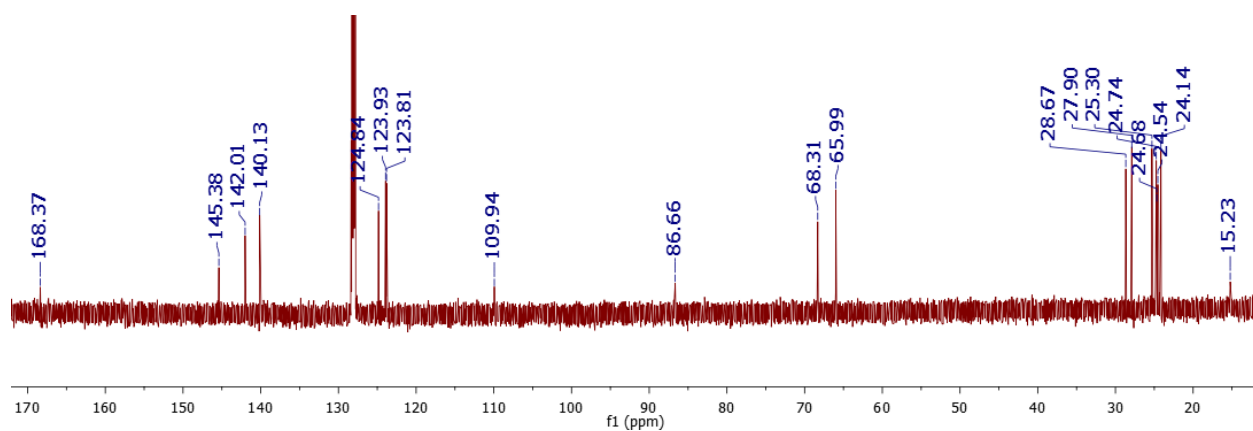

**Figure S3.**  $^{13}\text{C}$  NMR Spectrum (151 MHz, 25 °C) of **2** in  $\text{C}_6\text{D}_6$

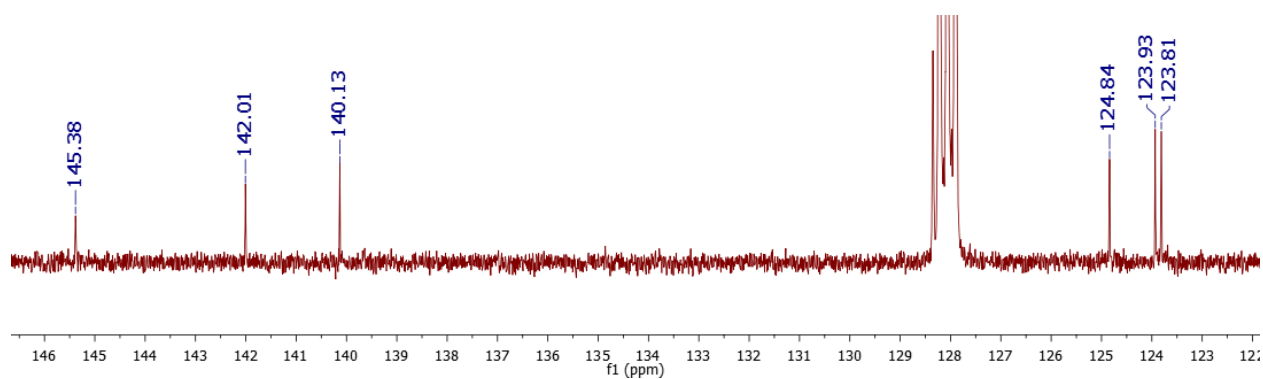

**Figure S4.** Aryl region of  $^{13}\text{C}$  NMR Spectrum (151 MHz, 25 °C) of **2** in  $\text{C}_6\text{D}_6$

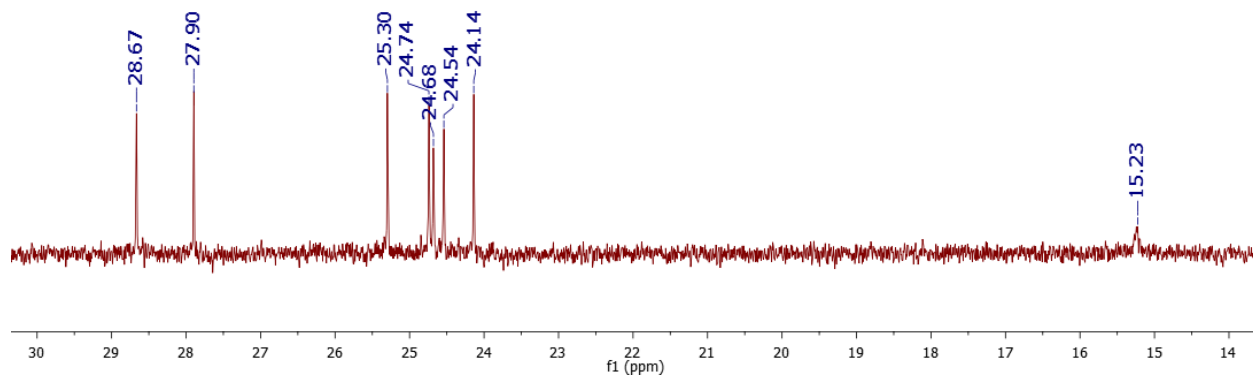

**Figure S5.** Alkyl region of  $^{13}\text{C}$  NMR Spectrum (151 MHz, 25 °C) of **2** in  $\text{C}_6\text{D}_6$

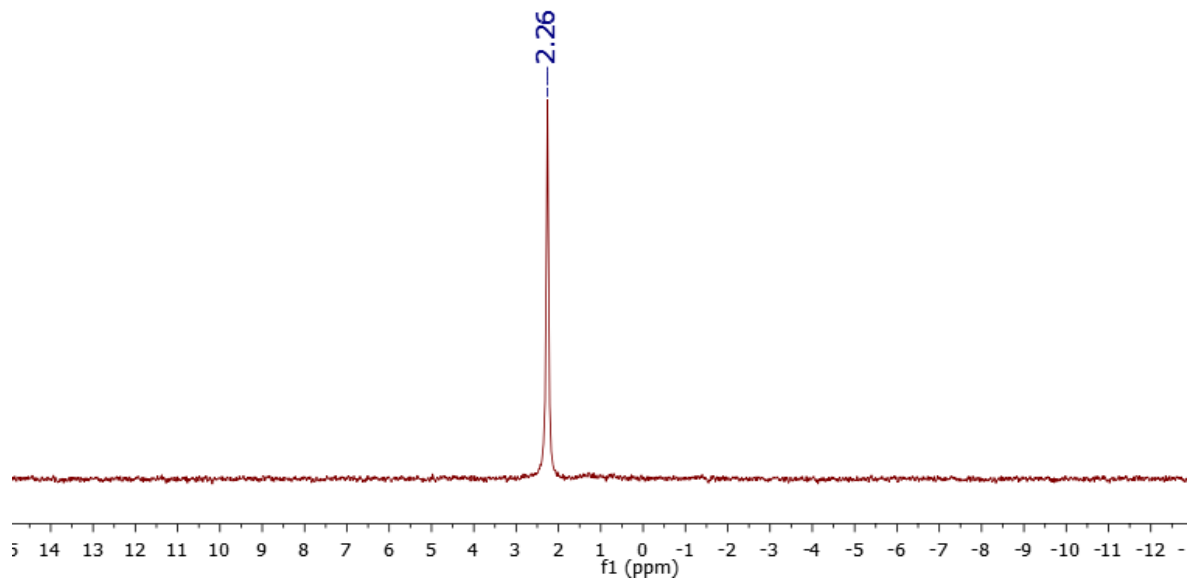

**Figure S6.**  $^7\text{Li}$  NMR Spectrum (194 MHz, 25 °C) of **3**(thf) in  $\text{C}_6\text{D}_6$

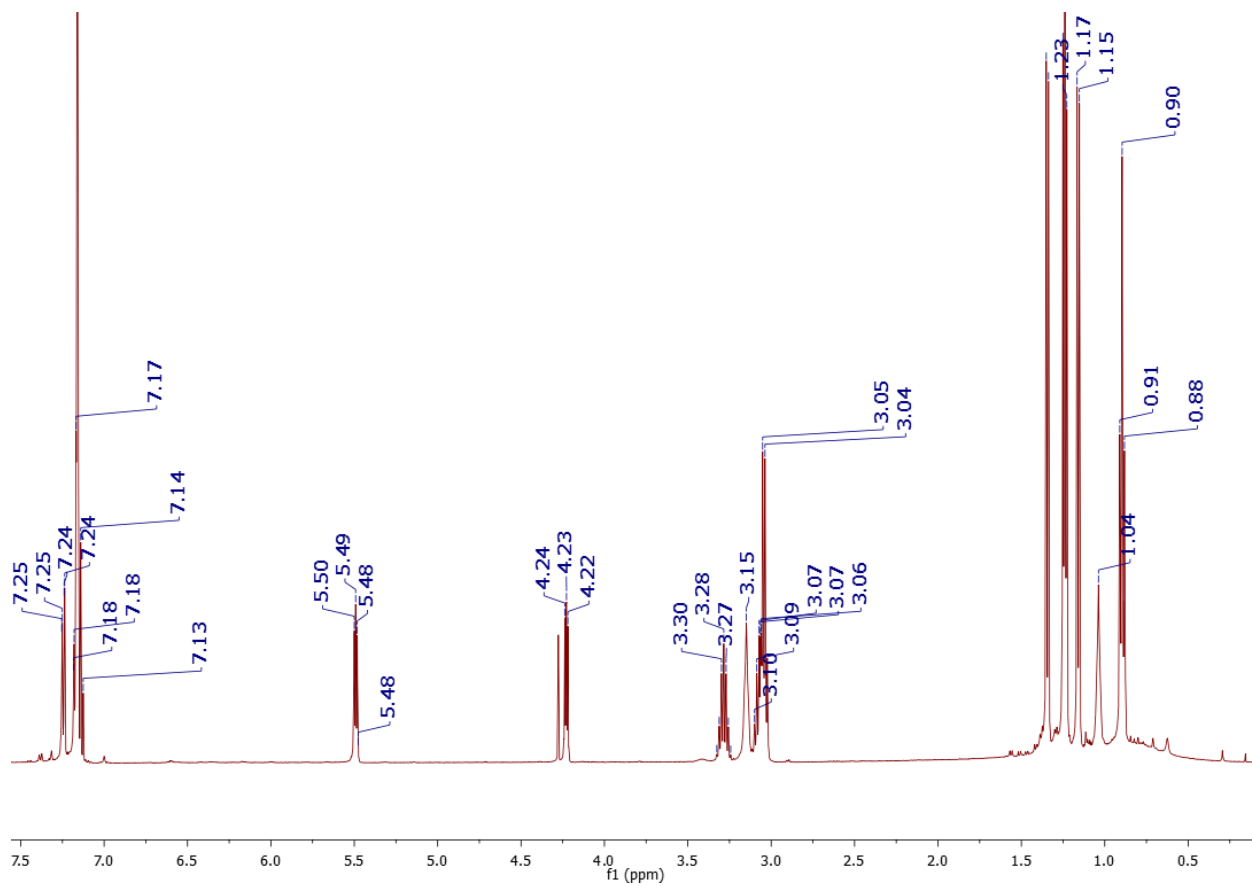

**Figure S7.**  $^1\text{H}$  NMR Spectrum (500 MHz, 25 °C) of **3**(thf) in  $\text{C}_6\text{D}_6$ . Note: spectrum contains dichloromethane at 4.28 ppm

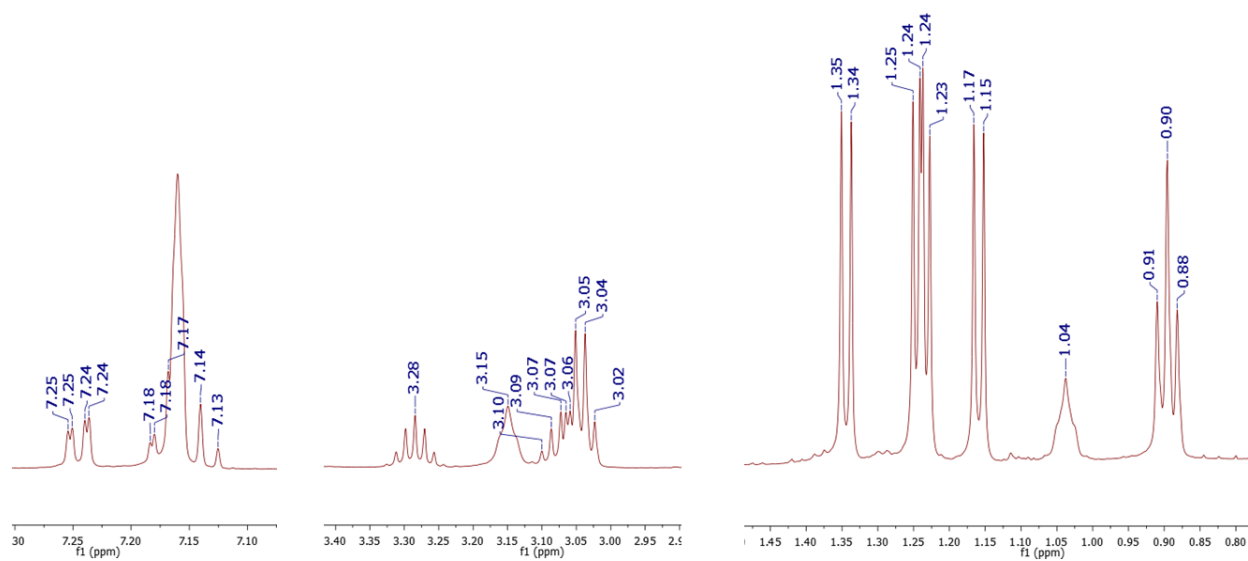

**Figure S8.** Expansion of selected regions of  $^1\text{H}$  NMR Spectrum (500 MHz, 25 °C) of **3**(thf) in  $\text{C}_6\text{D}_6$ .

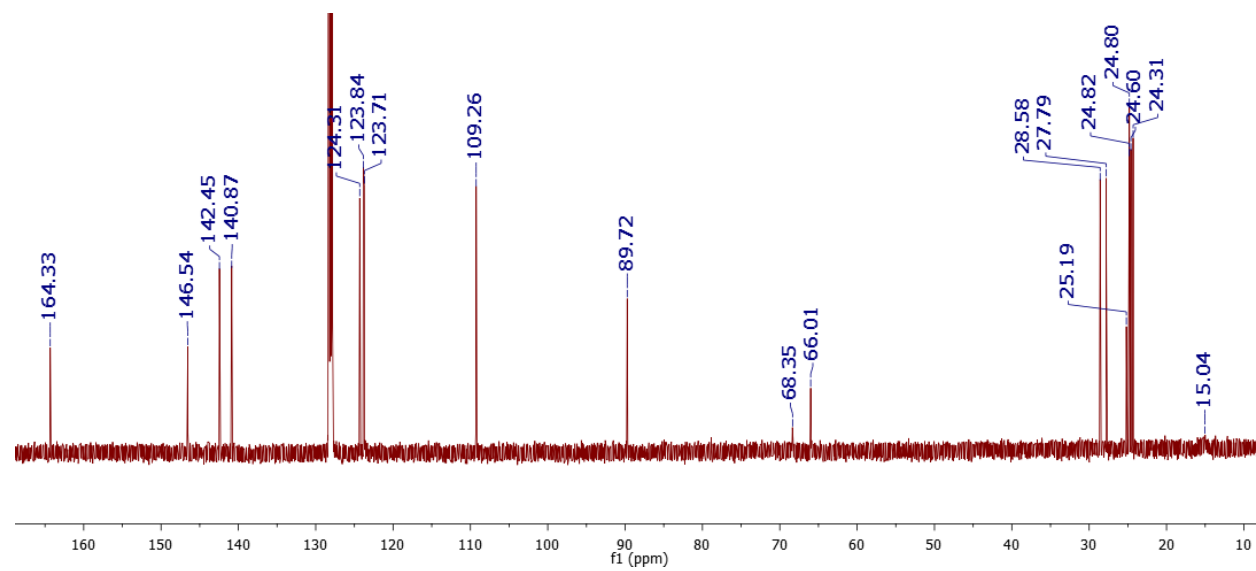

**Figure S9.**  $^{13}\text{C}$  NMR Spectrum (126 MHz, 25 °C) of **3**(thf) in  $\text{C}_6\text{D}_6$

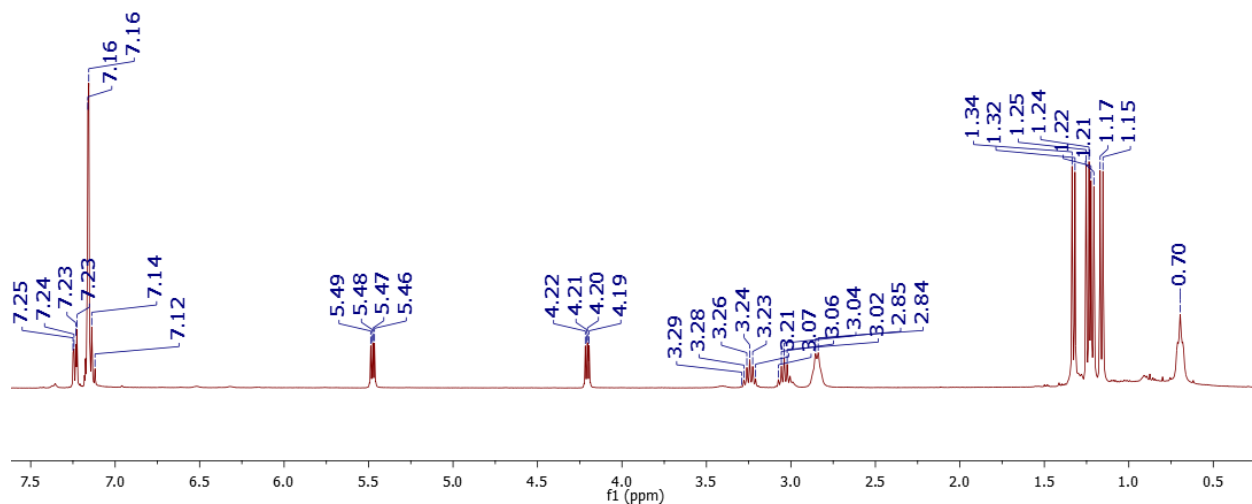

**Figure S10.**  $^1\text{H}$  NMR Spectrum (400 MHz, 25 °C) of **3** in  $\text{C}_6\text{D}_6$

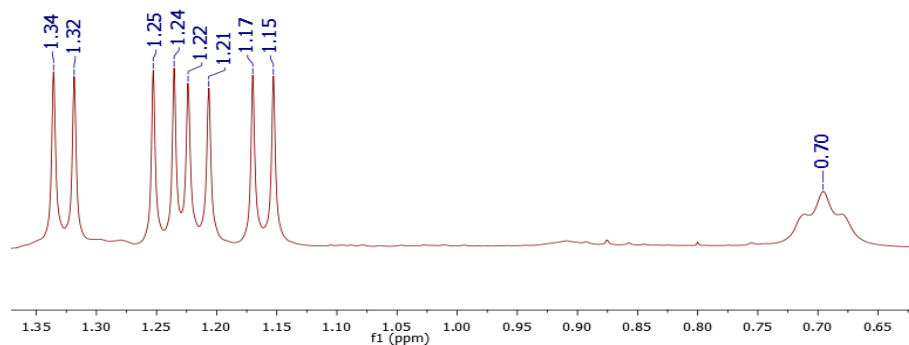

**Figure S11.** Expansion of the alkyl region of  $^1\text{H}$  NMR Spectrum (400 MHz, 25 °C) of **3** in  $\text{C}_6\text{D}_6$

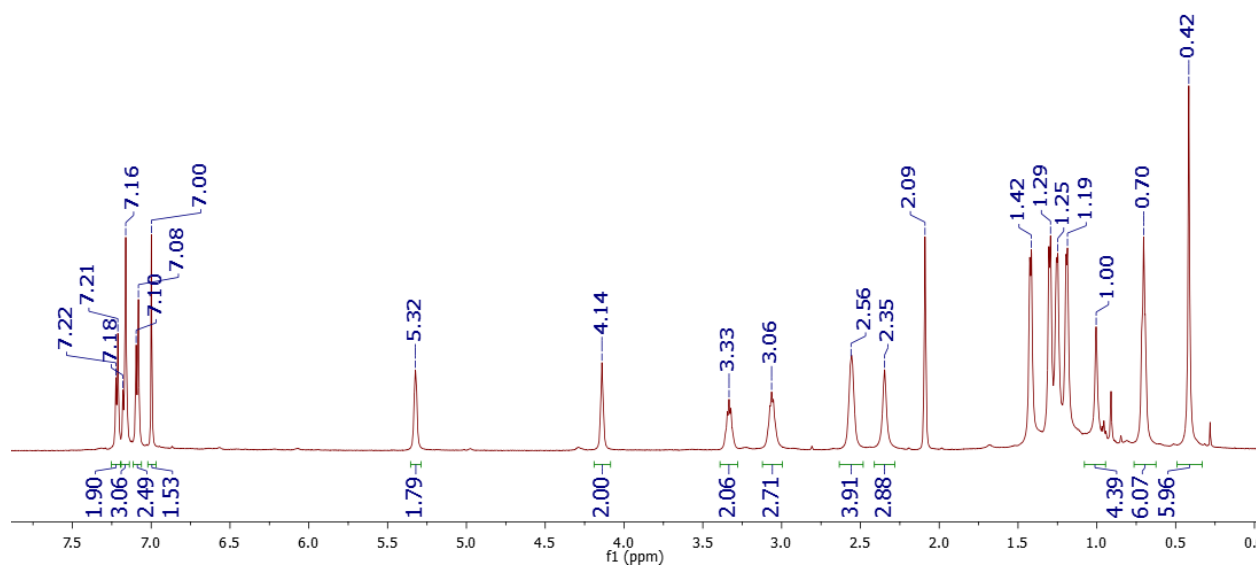

**Figure S12.**  $^1\text{H}$  NMR Spectrum (600 MHz, -80 °C) of **3** in  $\text{C}_6\text{D}_5\text{CD}_3$

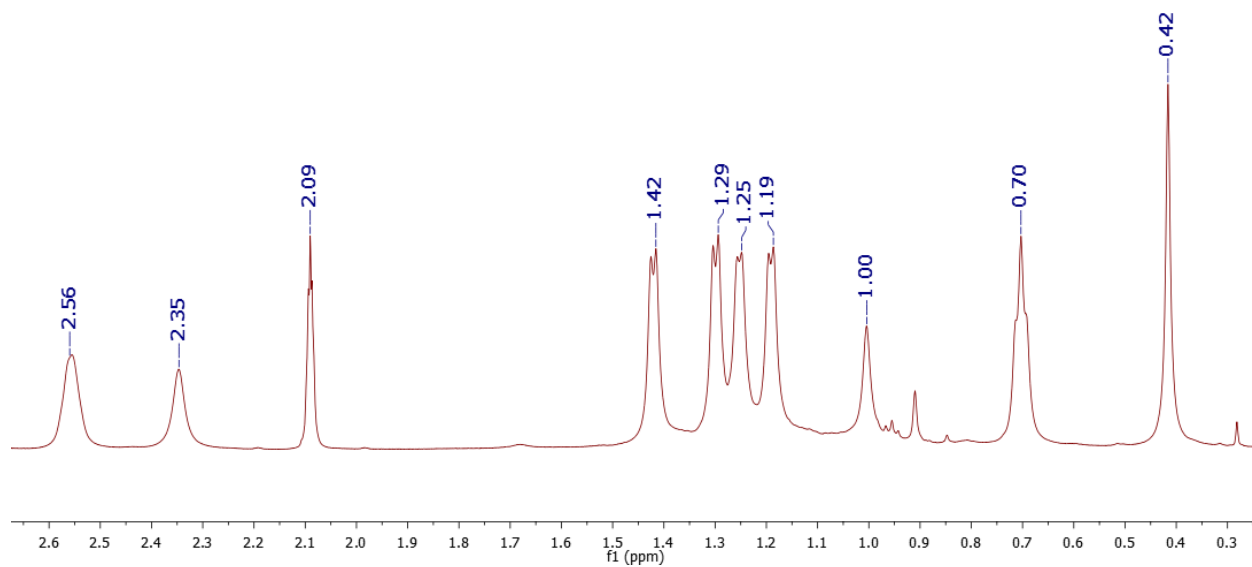

**Figure S13.** Expansion of the alkyl region of  $^1\text{H}$  NMR Spectrum (600 MHz, 25 °C) of **3** in  $\text{C}_6\text{D}_5\text{CD}_3$

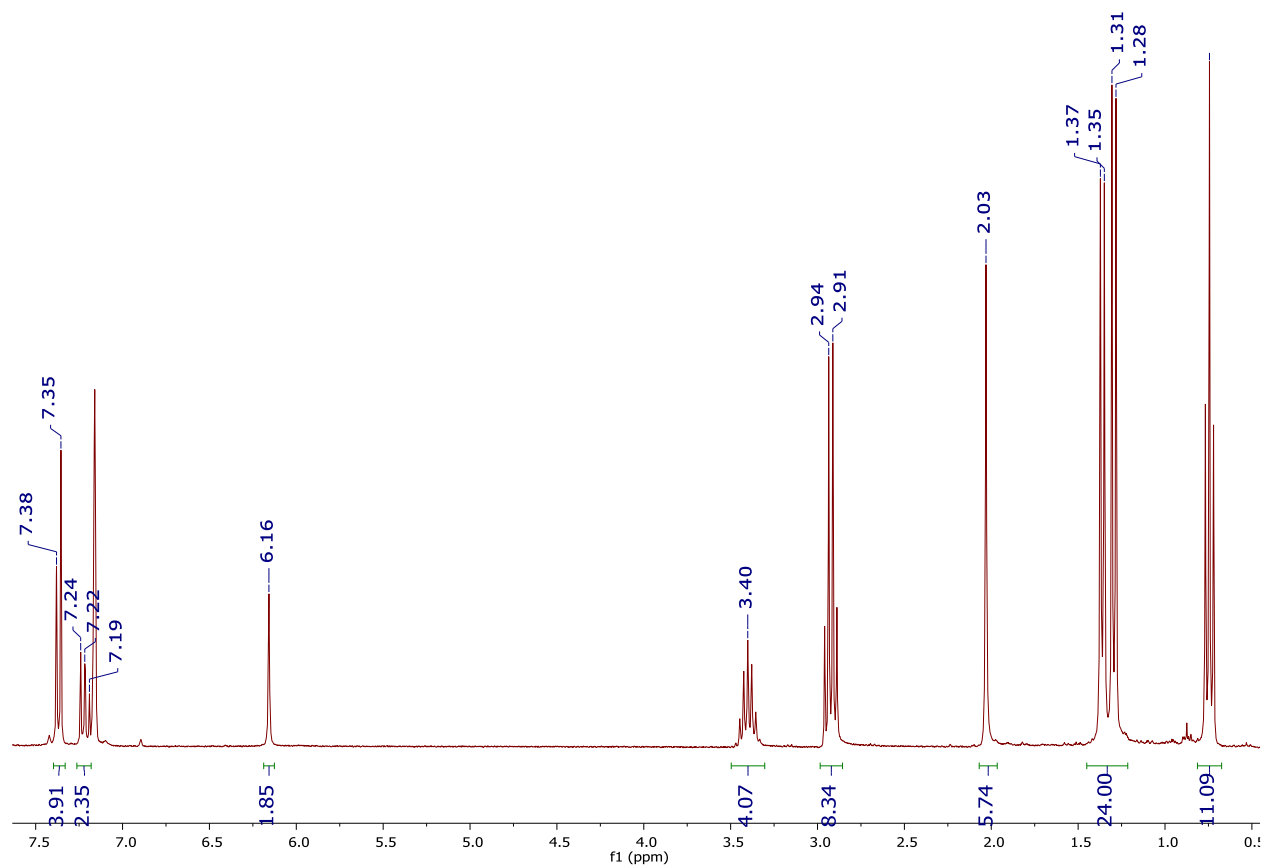

**Figure S14.**  $^1\text{H}$  NMR Spectrum (300 MHz, 25 °C) of **5** in  $\text{C}_6\text{D}_6$

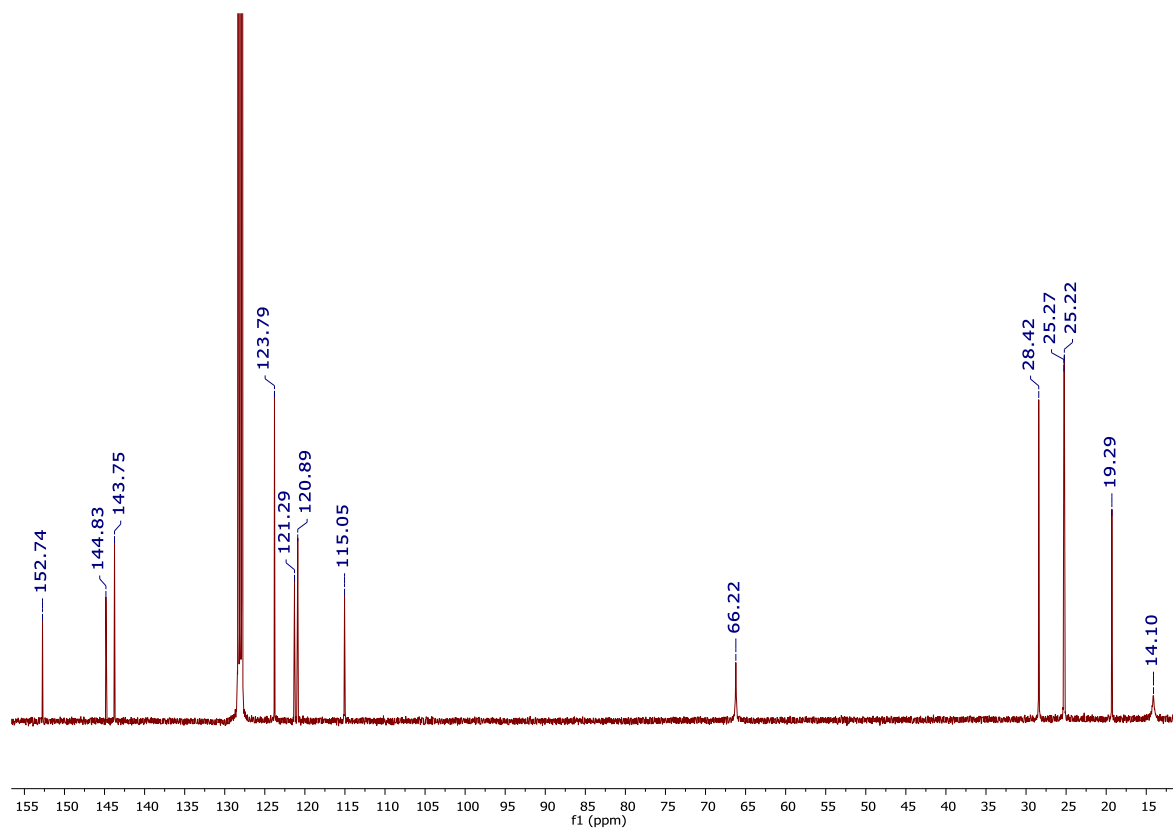

**Figure S15.** <sup>13</sup>C NMR Spectrum (101 MHz, 25 °C) of **5** in C<sub>6</sub>D<sub>6</sub>

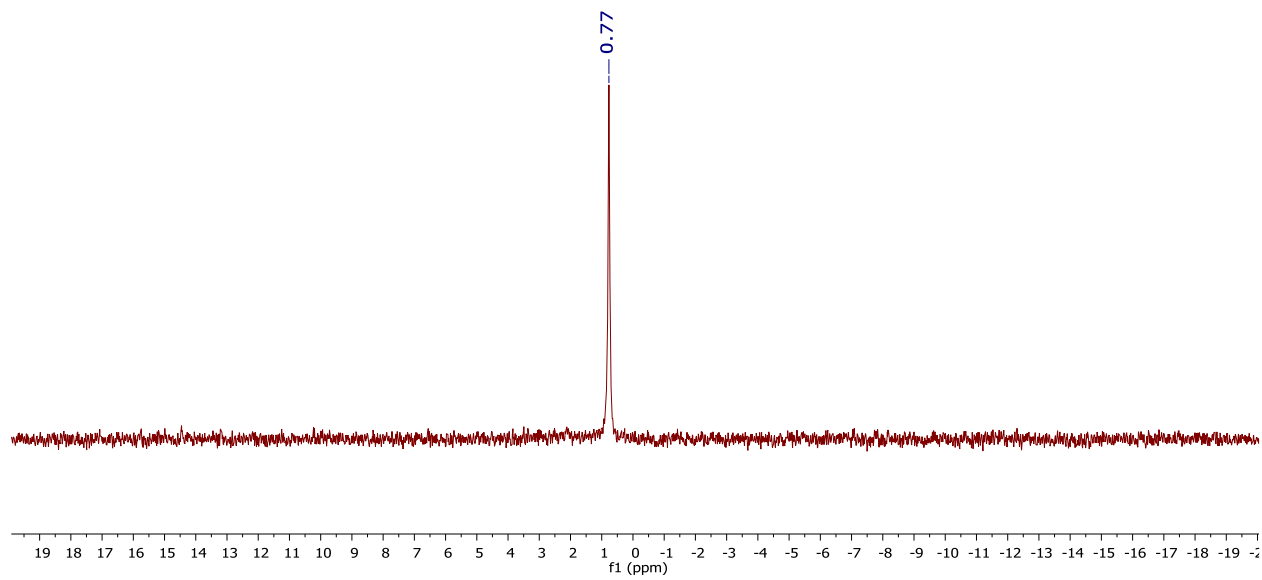

**Figure S16.** <sup>7</sup>Li NMR Spectrum (194 MHz, 25 °C) of **5** in C<sub>6</sub>D<sub>6</sub>



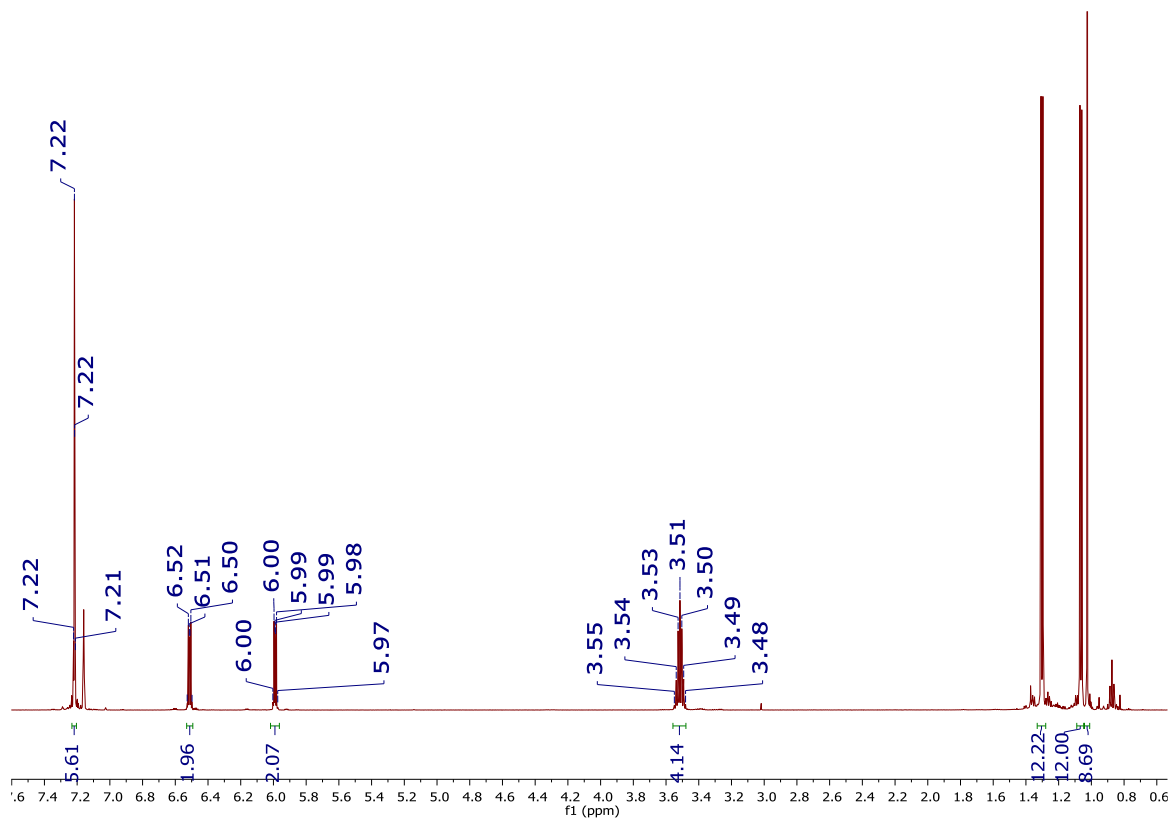

**Figure S17.**  $^1\text{H}$  NMR Spectrum (600 MHz, 25 °C) of **8** in  $\text{C}_6\text{D}_6$  spectrum contains pentane at 1.26 and 0.87

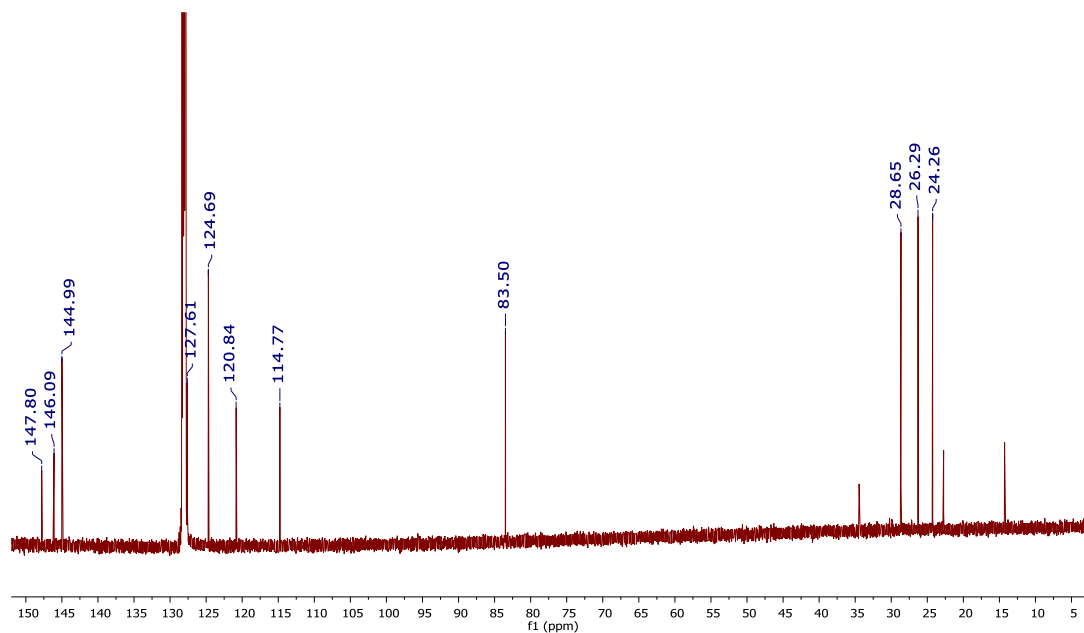

**Figure S18.**  $^{13}\text{C}$  NMR Spectrum (151 MHz, 25 °C) of **8** in  $\text{C}_6\text{D}_6$  Note: spectrum contains pentane at 34.45, 22.73, and 14.30.

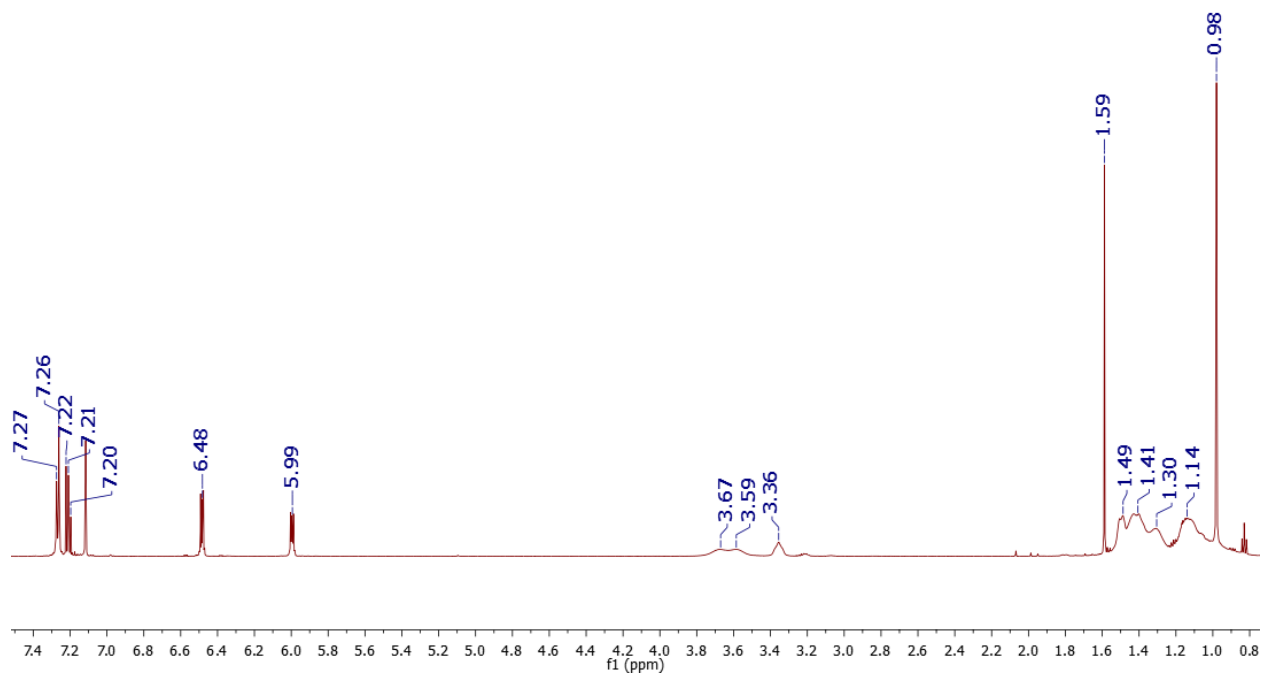

**Figure S19.**  $^1\text{H}$  NMR Spectrum (600 MHz, 25 °C) of **9** in  $\text{C}_6\text{D}_6$

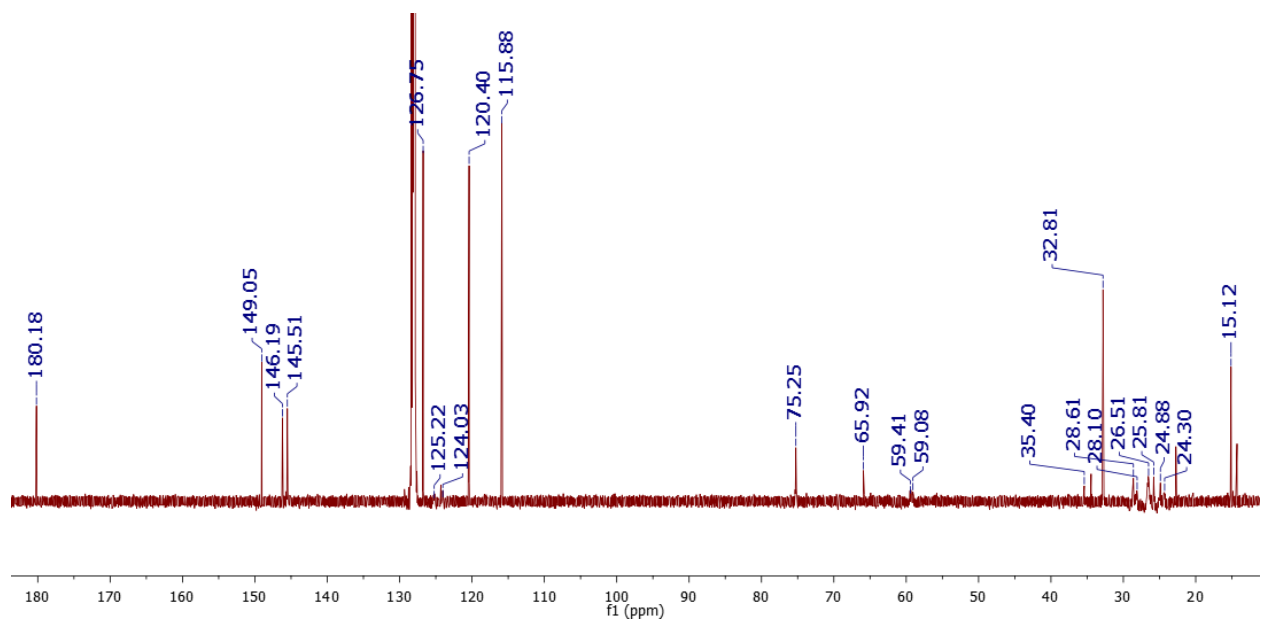

**Figure S20.**  $^{13}\text{C}$  NMR Spectrum (151 MHz, 2 °C) of **9** in  $\text{C}_6\text{D}_6$ .

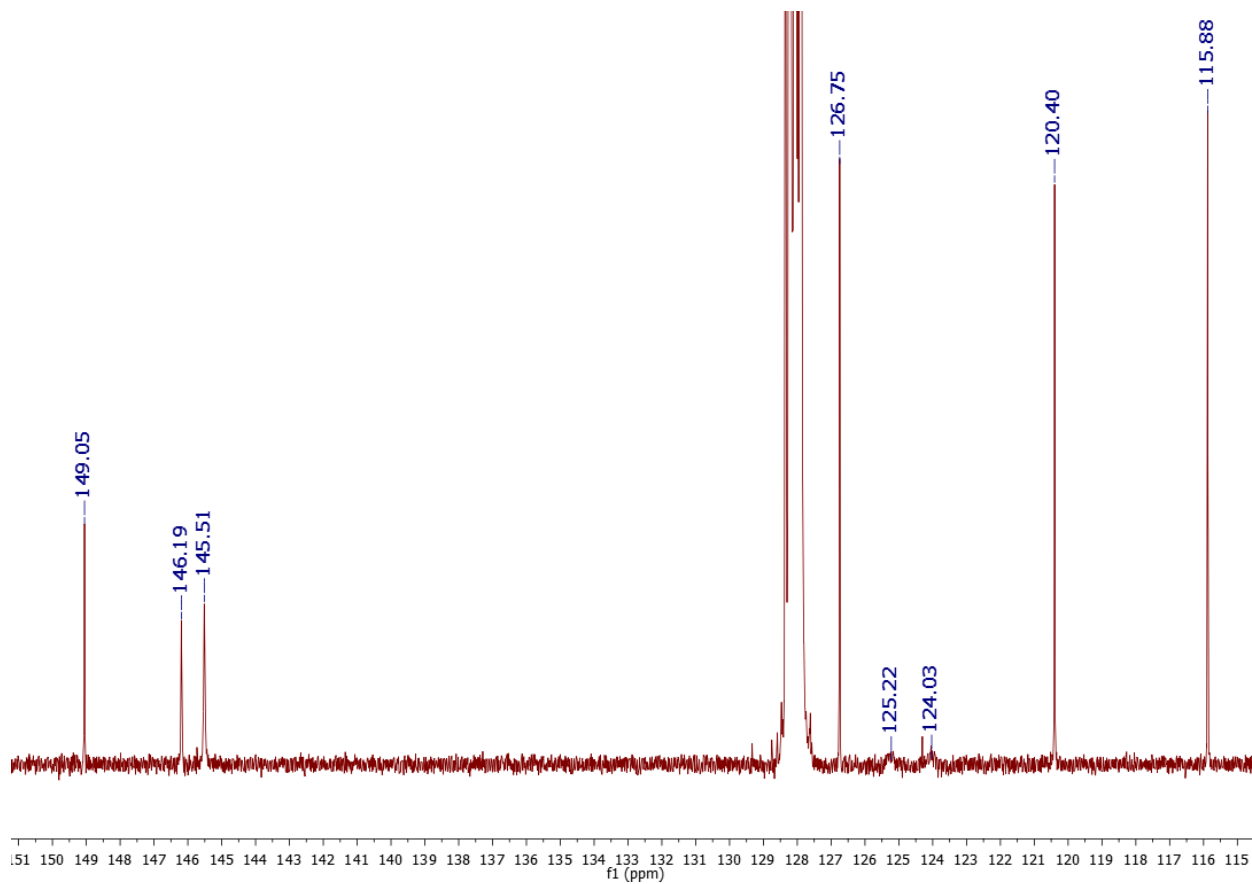

**Figure S21.** Aryl region of  $^{13}\text{C}$  NMR Spectrum (151 MHz, 25 °C) of **9** in  $\text{C}_6\text{D}_6$ .

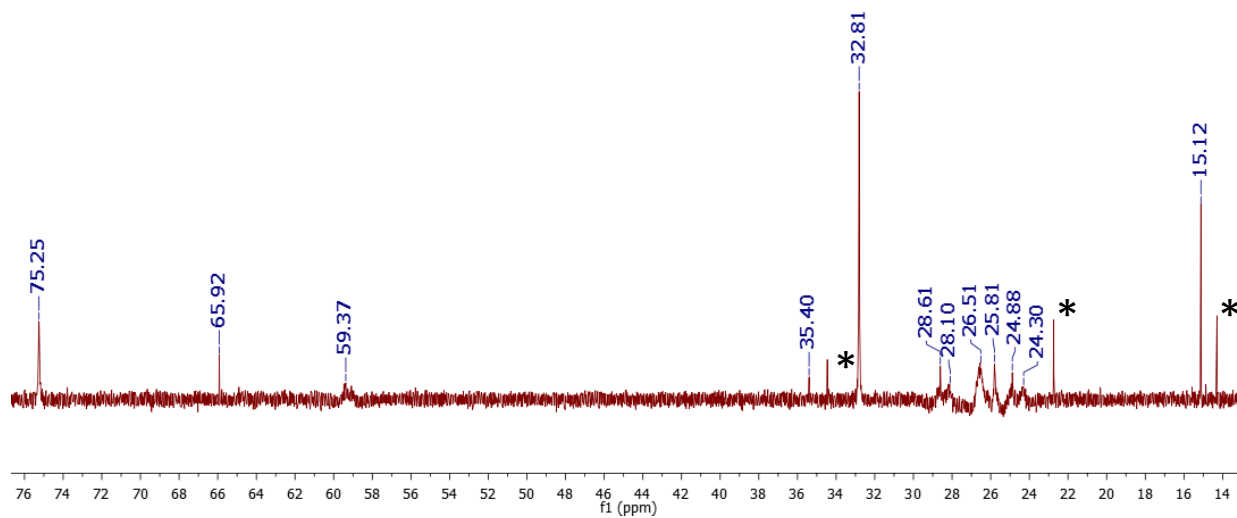

**Figure S22.** Alkyl region of  $^{13}\text{C}$  NMR Spectrum (151 MHz, 25 °C) of **9** in  $\text{C}_6\text{D}_6$ . Peaks due to residual pentane are marked with an asterisk.

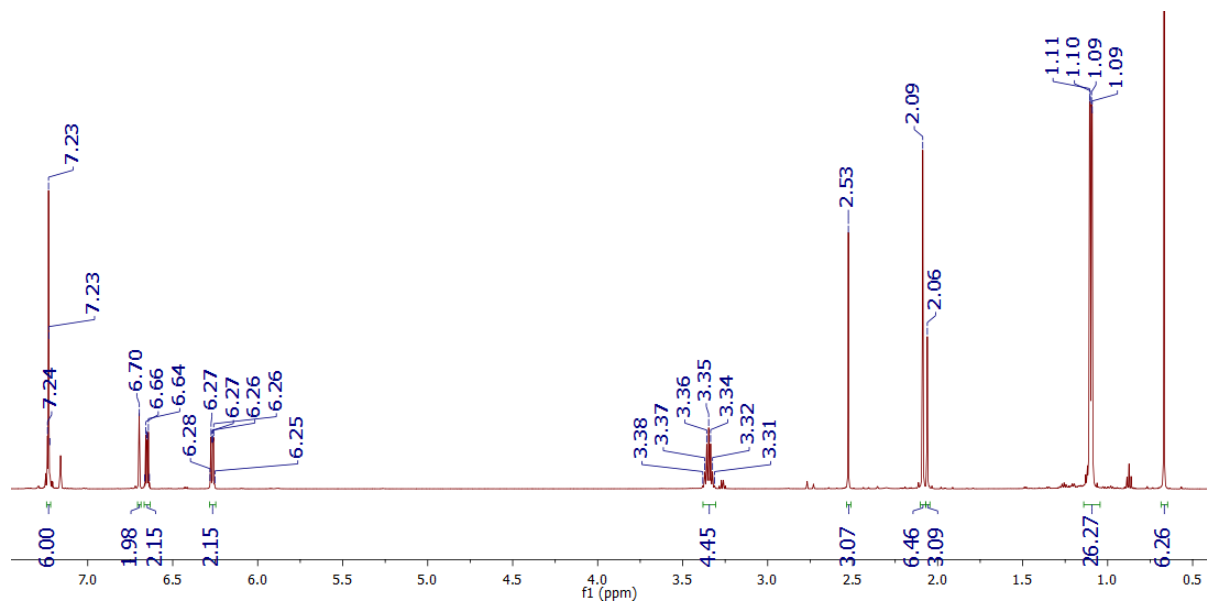

**Figure S23.**  $^1\text{H}$  NMR Spectrum (600 MHz, 25 °C) of **10** in  $\text{C}_6\text{D}_6$

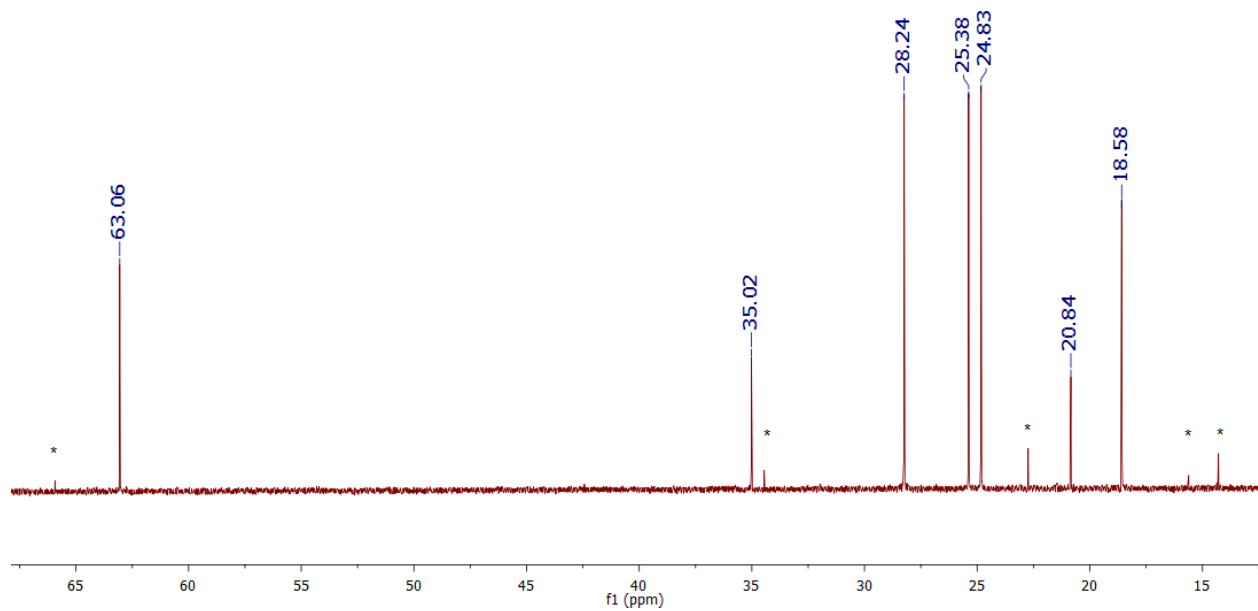

**Figure S24.** Alkyl region of  $^{13}\text{C}$  NMR Spectrum (151 MHz, 25 °C) of **10** in  $\text{C}_6\text{D}_6$ . Peaks due to residual pentane and  $\text{Et}_2\text{O}$  are marked with an asterisk.

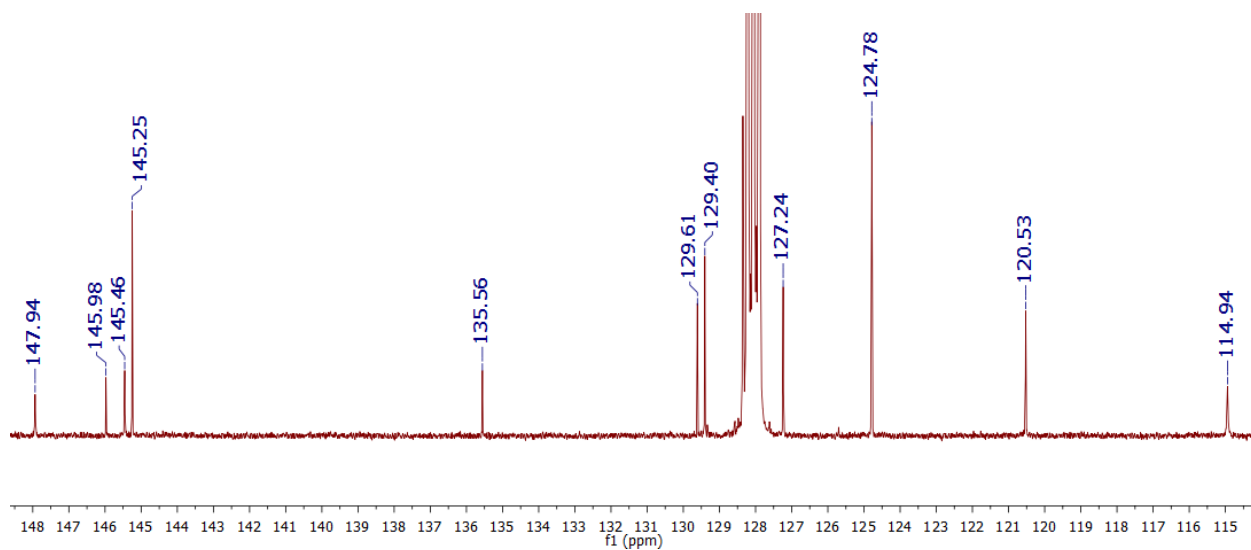

**Figure S25.** Aryl region of  $^{13}\text{C}$  NMR Spectrum (151 MHz, 25 °C) of **10** in  $\text{C}_6\text{D}_6$ .

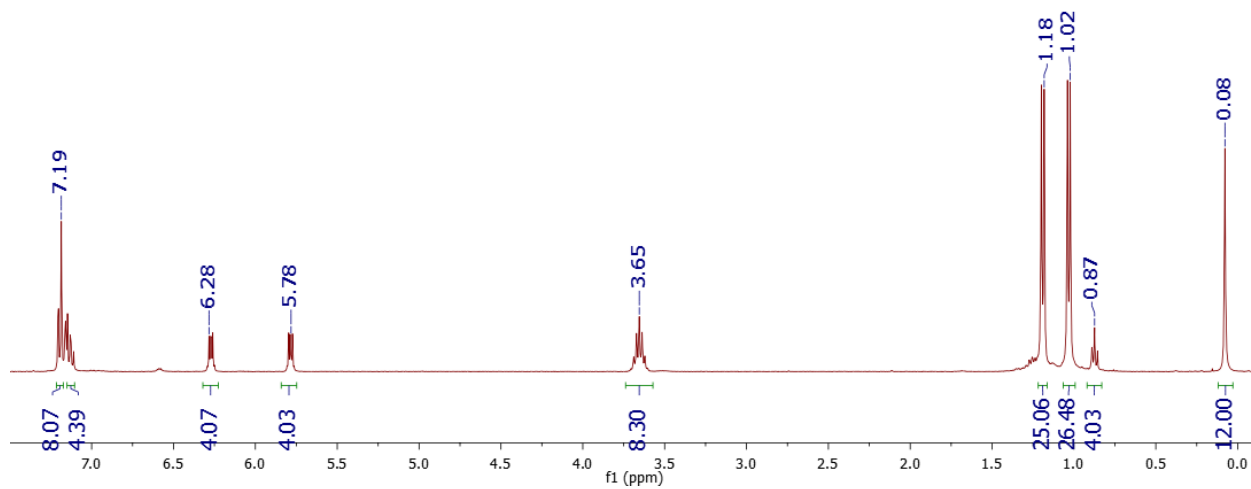

**Figure S26.**  $^1\text{H}$  NMR Spectrum (400 MHz, 25 °C) of **11**(pentane) $_2/3$  in  $\text{C}_6\text{D}_6$ .

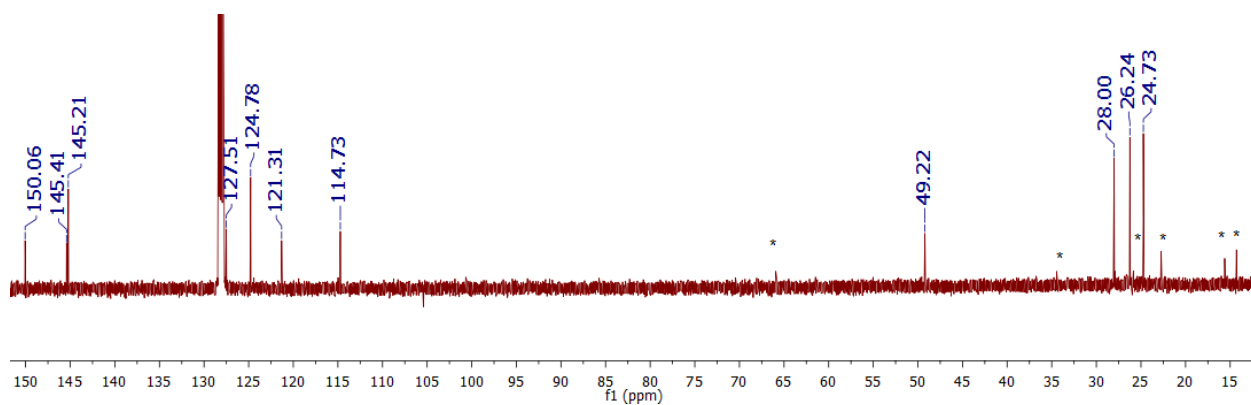

**Figure S27.**  $^{13}\text{C}$  NMR Spectrum (500 MHz, 25 °C) of **11** in  $\text{C}_6\text{D}_6$  Note: volatile impurities in the NMR solvent (THF,  $\text{Et}_2\text{O}$ , pentane) are marked with an asterisk

## 2. X-ray Crystallography

The X-ray diffraction data were collected on a Bruker Kappa Apex II diffractometer with graphite-monochromated Mo K $\alpha$  radiation ( $\lambda = 0.71073 \text{ \AA}$ ) at 150 K controlled by an Oxford Cryostream 700 series low-temperature system and processed with the Bruker Apex 2 software package.<sup>1</sup> The structures were solved by direct methods and refined using SHELXL-2013 and SHELXL-2014.<sup>2,3</sup> All non-hydrogen atoms were refined anisotropically, except for a few atoms involved in the disordered portions. All hydrogen atoms were calculated using the riding model. The diffuse residual electron density from a disordered cocrystallized pentane molecule in the lattice of **11** was removed with the SQUEEZE function of PLATON,<sup>4</sup> and was not included in the formula or the refinement. Selected crystallographic data are listed in Table 1S.

Synthesis of K<sub>2</sub>L(dme)<sub>4</sub>:

K<sub>2</sub>L (130 mg, 0.258 mmol) was recrystallized from cold 1,2-dimethoxyethane (dme, 5 mL). The supernatant was decanted from the yellow crystals, which were washed with cold dme (2 x 2 mL) and pentane (3 x 2 mL). Drying *in vacuo* yielded yellow K<sub>2</sub>L(dme)<sub>4</sub> (110 mg, 0.127 mmol, 49%), which is insoluble in C<sub>6</sub>D<sub>6</sub>.

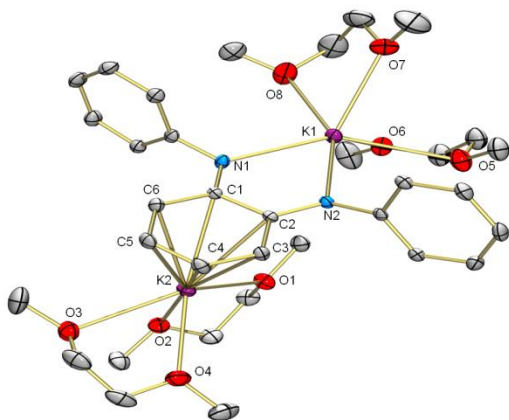

**Figure S28** Molecular structure of K<sub>2</sub>L(dme)<sub>4</sub> with 30% probability ellipsoids. Isopropyl groups and hydrogen atoms omitted for clarity. Selected bond lengths ( $\text{\AA}$ ) and angles ( $^\circ$ ): C1-C2 1.462(3), C2-C3 1.412(3), C3-C4 1.410(3), C4-C5 1.371(4), C5-C6 1.413(3), C1-N1 1.362(3), C2-N2 1.362(3), K1-N1 2.719(2), K1-N2 2.713(2), K1-O5 2.974(2), K1-O6 2.787(2), K1-O7 2.879(3), K1-O8 2.850(2), K2-C1 3.077(2), K2-C2 3.231(2), K2-C3 3.204(2), K2-C4 3.168(2), K2-C5 3.101(2), K2-C6 3.021(2), K2-O1 2.743(2), K2-O2 2.880(2), K2-O3 2.858(2), K2-O4 2.670(2), N1-K1-N2 61.24(6), O5-K1-O6 57.66(6), O7-K1-O8 61.68(7), O1-K2-O2 60.04(6), O3-K2-O4 59.84(6).

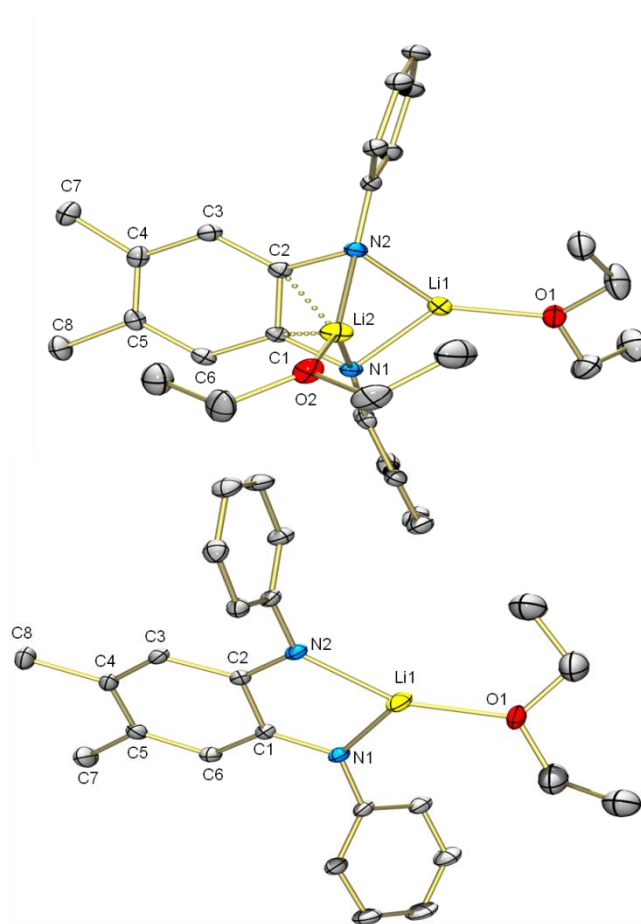

**Figure S29** Molecular structures of  $[\text{Li}_2\text{L}'(\text{Et}_2\text{O})_2]$ , **5** (top), and  $[\text{LiL}'(\text{Et}_2\text{O})]$ , **6** (bottom) with 30% probability ellipsoids. Only one disordered component of  $\text{Et}_2\text{O}$  molecules is shown. Isopropyl groups and hydrogen atoms are omitted for clarity. Selected bond angles ( $^\circ$ ) for **5**: N1-Li1-N2 85.4(1), O1-Li1-N1 129.4(2), O1-Li1-N2 141.6(2), N1-Li2-N2 80.6(1), O2-Li2-N1 134.5(2), O2-Li2-N2 144.9(2). Selected bond angles ( $^\circ$ ) for **6**: O1-Li1-N1 118.7(2), O1-Li1-N2 153.8(3), N1-Li1-N2 87.0(1)

**Table 1S** Selected bond lengths in **5** and **6**

| Bond  | Length in <b>5</b><br>( $\text{\AA}$ ) | Length in <b>6</b><br>( $\text{\AA}$ ) | Bond   | Length<br>in <b>5</b> ( $\text{\AA}$ ) | Length in <b>6</b><br>( $\text{\AA}$ ) |
|-------|----------------------------------------|----------------------------------------|--------|----------------------------------------|----------------------------------------|
| C1-C2 | 1.442(2)                               | 1.464(2)                               | Li1-N1 | 1.961(3)                               | 1.950(3)                               |
| C2-C3 | 1.404(3)                               | 1.426(2)                               | Li1-N2 | 1.968(4)                               | 1.960(3)                               |
| C3-C4 | 1.405(3)                               | 1.374(2)                               | Li1-O1 | 1.871(3)                               | 1.901(6)                               |
| C4-C5 | 1.404(2)                               | 1.426(2)                               | Li2-N1 | 2.056(4)                               |                                        |
| C5-C6 | 1.405(3)                               | 1.374(2)                               | Li2-C1 | 2.291(4)                               |                                        |
| C1-C6 | 1.394(2)                               | 1.427(2)                               | Li2-C2 | 2.324(4)                               |                                        |
| C1-N1 | 1.417(2)                               | 1.337(2)                               | Li2-N2 | 2.064(4)                               |                                        |
| C2-N2 | 1.407(2)                               | 1.339(2)                               | Li2-O2 | 1.997(4)                               |                                        |

## Discussion of the molecular structures of **5** and **6**.

Different from the solution data, the solid state structure of **5** (Figure S29) reveals that the two Li atoms occupy distinct coordination environments. Li1 resides in a distorted trigonal planar geometry: two amido nitrogen donor atoms and one oxygen from a terminal diethylether ligand occupy the three coordination sites. Li2 is tetracoordinate, engaging in an  $\eta^4$ - interaction with the two diamido nitrogen donor atoms and the two N-bound *o*-phenylene carbons. The coordination sphere of Li2 is completed by a terminal diethylether ligand. The NN chelate forms longer N-Li bonds with Li2 (2.056(4) and 2.064(4) Å) than with Li1 ((1.961(3) and 1.968(4) Å). Li1 sits on one side of the C1-C2-N1-N2 plane with a dihedral angle between this plane and N1-Li1-N2 plane of 37°; Li2 sits on the other side of the C1-C2-N1-N2 plane, with a dihedral angle between this plane and N1-Li2-N2 plane of 80°. Among related dilithium complexes of *o*-phenylenediamido ligands such as **1**, the *N,N'*-disilyl versions by Lappert,<sup>5</sup> or the *N,N'*-2,4,6-triisopropylphenyl version by Liddle,<sup>6</sup> **5** is structurally unique in that Et<sub>2</sub>O is used as a co-ligand instead of THF and that among these related complexes, the *ipso* carbons in **5** are bound the closest to Li (C1-Li2, 2.291(4) Å; C2-Li2, 2.324(4) Å).

The solid-state molecular structure of **6** (Figure S29) reveals that Li1 is chelated by the L<sup>+</sup> ligand and is bound to a terminal disordered solvent molecule modelled as a 70/30 ratio of Et<sub>2</sub>O/THF. The sum of the angles around Li is 359.5(4)°, consistent with a distorted trigonal planar geometry. One electron oxidation of L<sup>2+</sup> led to a pronounced decrease in the respective C1-N1 and C2-N2 bond lengths to 1.337(2) and 1.339(2) Å relative to the counterparts in **5** (1.417(2) and 1.407(2) Å). Akin to the structure of [LiL(OEt<sub>2</sub>)],<sup>7</sup> elongation of the C1-C6 and C2-C3 bonds to 1.427(2) and 1.426(2) Å and compression of the C5-C6 and C3-C4 bonds each to 1.374(2) Å is also observed. In the starting diamido complex **5** these bond lengths are statistically similar.

**Table 2S.** Crystallographic data for **2**, **3(thf)<sub>2</sub>**, **5**, **6**, **8**, **9**, **10**, **11**, and **K<sub>2</sub>L(dme)<sub>4</sub>**.

|                            | <b>2</b>                                                             | <b>3(thf)<sub>2</sub></b>                                          | <b>5</b>                                                                      | <b>6</b>                                             | <b>8</b>                                          |
|----------------------------|----------------------------------------------------------------------|--------------------------------------------------------------------|-------------------------------------------------------------------------------|------------------------------------------------------|---------------------------------------------------|
| Formula                    | C <sub>41</sub> H <sub>66</sub> ClLiN <sub>2</sub> O <sub>2</sub> Ta | C <sub>42</sub> H <sub>66</sub> LiN <sub>2</sub> O <sub>2</sub> Ta | C <sub>40</sub> H <sub>62</sub> Li <sub>2</sub> N <sub>2</sub> O <sub>2</sub> | C <sub>36</sub> H <sub>51.4</sub> LiN <sub>2</sub> O | C <sub>33</sub> H <sub>47</sub> N <sub>2</sub> Ta |
| FW                         | 842.29                                                               | 818.85                                                             | 616.79                                                                        | 535.13                                               | 652.67                                            |
| <i>T</i> (K)               | 150(2)                                                               | 150(2)                                                             | 150(2)                                                                        | 150(2)                                               | 150(2)                                            |
| space group                | P2 <sub>1</sub> /n                                                   | Pcba                                                               | P2 <sub>1</sub> /c                                                            | P2 <sub>1</sub> /n                                   | P2 <sub>1</sub> /n                                |
| <i>a</i> (Å)               | 11.0302(4)                                                           | 21.1920(16)                                                        | 11.4110(15)                                                                   | 8.9697(4)                                            | 10.6170(19)                                       |
| <i>b</i> (Å)               | 23.2106(8)                                                           | 18.2269(12)                                                        | 19.573(3)                                                                     | 21.8449(8)                                           | 17.966(3)                                         |
| <i>c</i> (Å)               | 17.0382(7)                                                           | 21.3088(16)                                                        | 17.749(2)                                                                     | 17.0042(7)                                           | 16.185(3)                                         |
| $\alpha$ (deg)             | 90                                                                   | 90                                                                 | 90                                                                            | 90                                                   | 90                                                |
| $\beta$ (deg)              | 108.6064(15)                                                         | 90                                                                 | 93.323(6)                                                                     | 94.395(2)                                            | 98.038(7)                                         |
| $\gamma$ (deg)             | 90                                                                   | 90                                                                 | 90                                                                            | 90                                                   | 90                                                |
| <i>V</i> (Å <sup>3</sup> ) | 4134.1(3)                                                            | 8230.8(10)                                                         | 3957.6(9)                                                                     | 3322.0(2)                                            | 3056.8(9)                                         |



|                                            |                                               |                                 |                                 |                                 |                                 |
|--------------------------------------------|-----------------------------------------------|---------------------------------|---------------------------------|---------------------------------|---------------------------------|
| <i>Z</i>                                   | 4                                             | 8                               | 4                               | 4                               | 4                               |
| <i>D<sub>c</sub></i> (g·cm <sup>-3</sup> ) | 1.353                                         | 1.322                           | 1.035                           | 1.070                           | 1.418                           |
| <i>μ</i> (mm <sup>-1</sup> )               | 2.757                                         | 2.705                           | 0.061                           | 0.063                           | 3.618                           |
| no. of refln collected                     | 39363                                         | 70581                           | 19128                           | 28427                           | 24798                           |
| no. of indept refln                        | 9494                                          | 9454                            | 8876                            | 7647                            | 7023                            |
| GOF on <i>F</i> <sup>2</sup>               | 1.183                                         | 1.150                           | 1.010                           | 1.040                           | 1.128                           |
| <i>R</i> [ <i>I</i> > 2σ( <i>I</i> )]      | <i>R</i> <sub>1</sub> = 0.0233 <sup>a)</sup>  | <i>R</i> <sub>1</sub> = 0.0318  | <i>R</i> <sub>1</sub> = 0.0579  | <i>R</i> <sub>1</sub> = 0.0623  | <i>R</i> <sub>1</sub> = 0.0290  |
|                                            | <i>wR</i> <sub>2</sub> = 0.0577 <sup>b)</sup> | <i>wR</i> <sub>2</sub> = 0.0797 | <i>wR</i> <sub>2</sub> = 0.1525 | <i>wR</i> <sub>2</sub> = 0.1718 | <i>wR</i> <sub>2</sub> = 0.0441 |
| <i>R</i> (all data)                        | <i>R</i> <sub>1</sub> = 0.0339                | <i>R</i> <sub>1</sub> = 0.0647  | <i>R</i> <sub>1</sub> = 0.1088  | <i>R</i> <sub>1</sub> = 0.0865  | <i>R</i> <sub>1</sub> = 0.0683  |
|                                            | <i>wR</i> <sub>2</sub> = 0.0799               | <i>wR</i> <sub>2</sub> = 0.1160 | <i>wR</i> <sub>2</sub> = 0.1884 | <i>wR</i> <sub>2</sub> = 0.1896 | <i>wR</i> <sub>2</sub> = 0.0889 |

|                                                | <b>9</b>                                          | <b>10</b>                                         | <b>11</b>                                                      | <b>K<sub>2</sub>L(dme)<sub>4</sub></b>                                       |
|------------------------------------------------|---------------------------------------------------|---------------------------------------------------|----------------------------------------------------------------|------------------------------------------------------------------------------|
| Formula                                        | C <sub>46</sub> H <sub>69</sub> N <sub>4</sub> Ta | C <sub>42</sub> H <sub>58</sub> N <sub>5</sub> Ta | C <sub>64</sub> H <sub>88</sub> N <sub>4</sub> Ta <sub>2</sub> | C <sub>46</sub> H <sub>78</sub> N <sub>2</sub> O <sub>8</sub> K <sub>2</sub> |
| FW                                             | 859.00                                            | 813.88                                            | 1275.28                                                        | 865.30                                                                       |
| <i>T</i> (K)                                   | 150(2)                                            | 150(2)                                            | 150(2)                                                         | 149(2)                                                                       |
| space group                                    | P2 <sub>1</sub> /n                                | P-1                                               | P2 <sub>1</sub> /c                                             | P2 <sub>1</sub> /n                                                           |
| <i>a</i> (Å)                                   | 14.1372(15)                                       | 10.4591(8)                                        | 15.9017(5)                                                     | 10.8034(7)                                                                   |
| <i>b</i> (Å)                                   | 15.1014(15)                                       | 12.8533(10)                                       | 19.5480(4)                                                     | 27.6688(19)                                                                  |
| <i>c</i> (Å)                                   | 20.108(2)                                         | 16.2426(13)                                       | 22.0555(5)                                                     | 17.1421(12)                                                                  |
| $\alpha$ (deg)                                 | 90                                                | 69.066(3)                                         | 90                                                             | 90                                                                           |
| $\beta$ (deg)                                  | 96.647(4)                                         | 82.852(4)                                         | 92.2620(11)                                                    | 98.503(2)                                                                    |
| $\gamma$ (deg)                                 | 90                                                | 76.536(3)                                         | 90                                                             | 90                                                                           |
| <i>V</i> (Å <sup>3</sup> )                     | 4264.1(8)                                         | 1981.3(3)                                         | 6850.5(3)                                                      | 5067.7(6)                                                                    |
| <i>Z</i>                                       | 4                                                 | 2                                                 | 4                                                              | 4                                                                            |
| <i>D<sub>c</sub></i> (g·cm <sup>-3</sup> )     | 1.338                                             | 1.364                                             | 1.236                                                          | 1.070                                                                        |
| $\mu$ (mm <sup>-1</sup> )                      | 2.613                                             | 2.808                                             | 3.227                                                          | 0.235                                                                        |
| no. of refln collected                         | 37634                                             | 23806                                             | 65508                                                          | 33778                                                                        |
| no. of indept refln                            | 9755                                              | 9050                                              | 15746                                                          | 8874                                                                         |
| GOF on <i>F</i> <sup>2</sup>                   | 0.956                                             | 1.040                                             | 0.933                                                          | 1.039                                                                        |
| <i>R</i> [ <i>I</i> > 2 $\sigma$ ( <i>I</i> )] | <i>R</i> <sub>1</sub> = 0.0407 <sup>a)</sup>      | <i>R</i> <sub>1</sub> = 0.0209                    | <i>R</i> <sub>1</sub> = 0.0356                                 | <i>R</i> <sub>1</sub> = 0.0519                                               |
|                                                | <i>wR</i> <sub>2</sub> = 0.0839 <sup>b)</sup>     | <i>wR</i> <sub>2</sub> = 0.0482                   | <i>wR</i> <sub>2</sub> = 0.0791                                | <i>wR</i> <sub>2</sub> = 0.1425                                              |
| <i>R</i> (all data)                            | <i>R</i> <sub>1</sub> = 0.0893                    | <i>R</i> <sub>1</sub> = 0.0257                    | <i>R</i> <sub>1</sub> = 0.0595                                 | <i>R</i> <sub>1</sub> = 0.0715                                               |
|                                                | <i>wR</i> <sub>2</sub> = 0.0990                   | <i>wR</i> <sub>2</sub> = 0.0499                   | <i>wR</i> <sub>2</sub> = 0.0853                                | <i>wR</i> <sub>2</sub> = 0.1600                                              |

<sup>a)</sup>  $R_1 = \sum(F_o - F_c)/\sum F_o$     <sup>b)</sup>  $wR_2 = [\sum[w(F_o^2 - F_c^2)^2]/\sum w(F_o^2)^2]^{1/2}$

### 3. EPR Spectroscopy

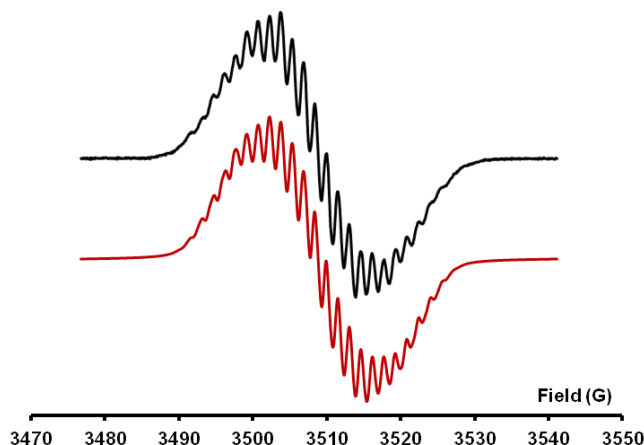

**Figure S30** Experimental (top) and simulated (bottom) EPR spectrum of **6** (thf solution, room temperature) X-band microwave frequency 9.856 GHz. Parameters used in simulation: 100% Lorentzian lineshape,  $g = 2.0075$ ,  $a_N = 4.58$  G,  $a_H = 3.39$  and  $1.53$  G,  $a_{Li} = 0.85$  G,

The room temperature EPR spectrum of a THF solution of **6** is shown in Figure S30. The  $g$  factor of **6** is 2.0075; it is close to the free electron value of 2.0036, which is expected for an organic radical with negligible spin-orbit coupling. The multiplet pattern was simulated taking into account hyperfine coupling to a pair of equivalent  $^{14}\text{N}$  nuclei, a pair of equivalent *o*-phenylene  $^1\text{H}$  nuclei, the six equivalent 4,5-dimethyl  $^1\text{H}$  nuclei, and one  $^7\text{Li}$  nucleus. The multiplet pattern is consistent with delocalization of the unpaired electron throughout the *o*-phenylene framework, which has been observed in EPR spectra of  $[\text{LiL}(\text{OEt}_2)]$ .<sup>7</sup>

### 4. References:

1. Apex 2 Software Package; Bruker AXS Inc., Madison, WI, 2013.
2. Sheldrick, G. M. *Acta Crystallogr., Sect. A: Found. Crystallogr.* 2008, 64, 112.
3. <http://shelx.uni-ac.gwdg.de/SHELX/index.php> (accessed July 4, 2013 and September 4, 2015).
4. Spek, A. L. *J. Appl. Crystallogr.* 2003, 36, 7.
5. S. Daniele, C. Drost, B. Gehrhus, S. M. Hawkins, P. B. Hitchcock, M. F. Lappert, P. G. Merle and S. G. Bott, *J. Chem. Soc., Dalton Trans.*, 2001, 3179.
6. S. Robinson, E. S. Davies, W. Lewis, A. J. Blake and S. T. Liddle, *Dalton Trans.*, 2014, **43**, 4351-4360
7. T. Janes, J. M. Rawson and D. Song, *Dalton Trans.*, 2013, **42**, 10640-10648.
